# Supplementary material
Source: PubMed Central journal article supplement (PMC9724878)
Supplement: EIJ-D-22-00045_Sugiura_SD.pdf [file EIJ-D-22-00045_Sugiura_SD.pdf]

## Supplementary data

**Supplementary Table 1. Association of adjusted variables for the primary endpoint.**

| Variables                     | Unadjusted       |         | Adjusted         |         |
|-------------------------------|------------------|---------|------------------|---------|
|                               | HR (95%CI)       | p-value | HR (95%CI)       | p-value |
| Age                           | 0.99 (0.98–1.01) | 0.37    | 0.99 (0.97–1.01) | 0.26    |
| Sex female                    | 1.03 (0.77–1.37) | 0.85    | 0.94 (0.69–1.27) | 0.67    |
| Atrial fibrillation           | 1.17 (0.86–1.59) | 0.32    | 1.02 (0.74–1.43) | 0.89    |
| Coronary artery disease       | 1.59 (1.17–2.16) | 0.003   | 1.58 (1.13–2.20) | 0.007   |
| Estimated GFR                 | 0.99 (0.98–1.00) | 0.02    | 0.99 (0.98–1.00) | 0.07    |
| Logistic EuroSCORE            | 1.01 (1.00–1.02) | 0.08    | 1.00 (0.99–1.01) | 0.50    |
| New York Heart Association    | 1.49 (1.00–2.22) | 0.05    | 1.51 (0.98–2.32) | 0.06    |
| LV ejection fraction          | 0.99 (0.98–0.99) | 0.01    | 0.99 (0.98–1.00) | 0.19    |
| MR moderate-to-severe or more | 0.78 (0.54–1.14) | 0.20    | 0.83 (0.56–1.23) | 0.35    |
| TAPSE/PASP                    | 0.30 (0.14–0.64) | 0.002   | 0.45 (0.22–0.93) | 0.031   |

CI: confidence interval; GFR: glomerular filtration ratio; HR: hazard ratio; LV: left ventricular; MR: mitral regurgitation; PASP: pulmonary artery systolic pressure; TAPSE: tricuspid annular plane systolic excursion

**Supplementary Table 2. Summarised output of mediation analysis.**

| Effect*                                               | Est. (95%CI)        | Exp (Est.) (95%CI) |
|-------------------------------------------------------|---------------------|--------------------|
| <b>Total effect of TR</b>                             |                     |                    |
| Pure natural direct effect                            | 0.65 (0.25-1.06)    | 1.92 (1.28-2.87)   |
| Total natural indirect effect mediated by RV function | -0.001 (-0.01-0.01) | 1.00 (0.99-1.01)   |
| Total natural direct effect                           | 0.66 (0.25-1.06)    | 1.93 (1.29-2.89)   |
| Proportion mediated                                   | -0.01 (-0.02-0.01)  | NA                 |

\*All effects are conditional on covariates and for an average individual.

CI: confidence interval; Est.: estimated; Exp: exponentiation

**Supplementary Table 3. Association of post-procedural variables in the Cox proportional hazard model.**

| Variables                              | Unadjusted       |         | Adjusted         |         |
|----------------------------------------|------------------|---------|------------------|---------|
|                                        | HR (95%CI)       | p-value | HR (95%CI)       | p-value |
| Age                                    | 0.99 (0.98–1.01) | 0.51    | 0.98 (0.97–1.01) | 0.14    |
| Sex female                             | 0.97 (0.71–1.31) | 0.81    | 0.76 (0.54–1.07) | 0.11    |
| Atrial fibrillation                    | 1.41 (0.99–2.00) | 0.055   | 1.15 (0.80–1.67) | 0.45    |
| Coronary artery disease                | 1.54 (1.10–2.16) | 0.011   | 1.51 (1.04–2.19) | 0.029   |
| Estimated GFR                          | 0.99 (0.98–1.00) | 0.009   | 0.99 (0.98–1.00) | 0.030   |
| Logistic EuroSCORE                     | 1.01 (1.00–1.02) | 0.11    | 1.00 (0.99–1.01) | 0.60    |
| New York Heart Association             | 1.33 (0.87–2.02) | 0.18    | 1.43 (0.90–2.27) | 0.13    |
| Post-procedural LV ejection fraction   | 0.99 (0.98–1.00) | 0.011   | 0.99 (0.98–1.00) | 0.030   |
| Residual MR moderate-to-severe or more | 1.29 (0.73–2.27) | 0.38    | 1.54 (0.81–2.96) | 0.19    |
| Post-procedural TAPSE/PASP             | 0.30 (0.15–0.58) | <0.001  | 0.45 (0.23–0.87) | 0.017   |

CI: confidence interval; GFR: glomerular filtration ratio; HR: hazard ratio; LV: left ventricular; MR: mitral regurgitation; PASP: pulmonary artery systolic pressure; TAPSE: tricuspid annular plane systolic excursion

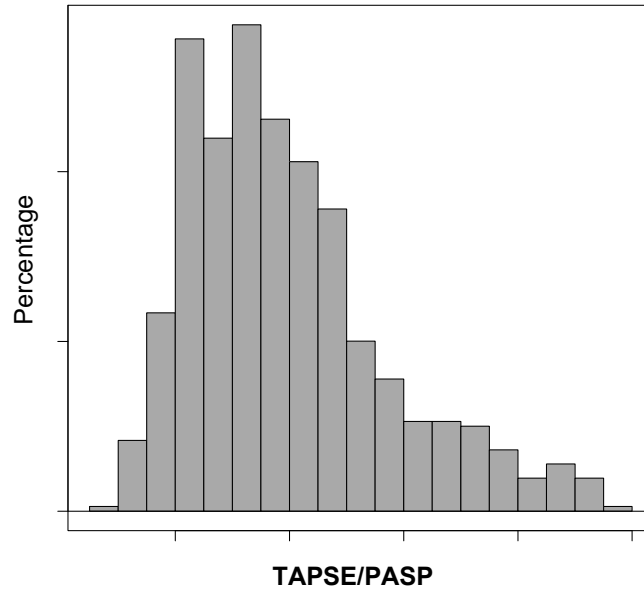

**Supplementary Figure 1. Distribution of TAPSE/PASP.**

Shown is the histogram of TAPSE/PASP values, with a mean value of  $0.43 \pm 0.25$ .

PASP: pulmonary artery systolic pressure; TAPSE: tricuspid annular plane systolic excursion

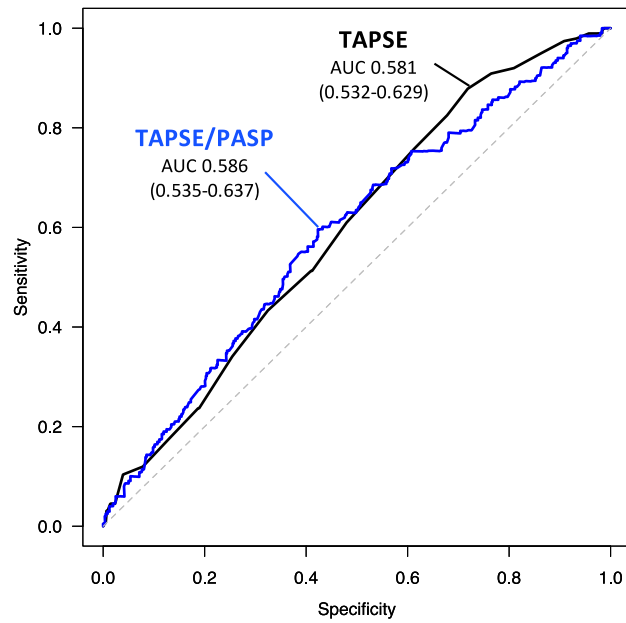

**Supplementary Figure 2. Receiver operating characteristics curve analysis for predicting all-cause mortality or rehospitalisation due to heart failure.**

Shown is the ROC curve analysis showing that, in the present study, TAPSE was comparable to TAPSE/PASP in predicting the composite of mortality or rehospitalisation after mitral TEER.

AUC: area under the curve; PASP: pulmonary artery systolic pressure; ROC: receiver operating characteristics; TAPSE: tricuspid annular plane systolic excursion

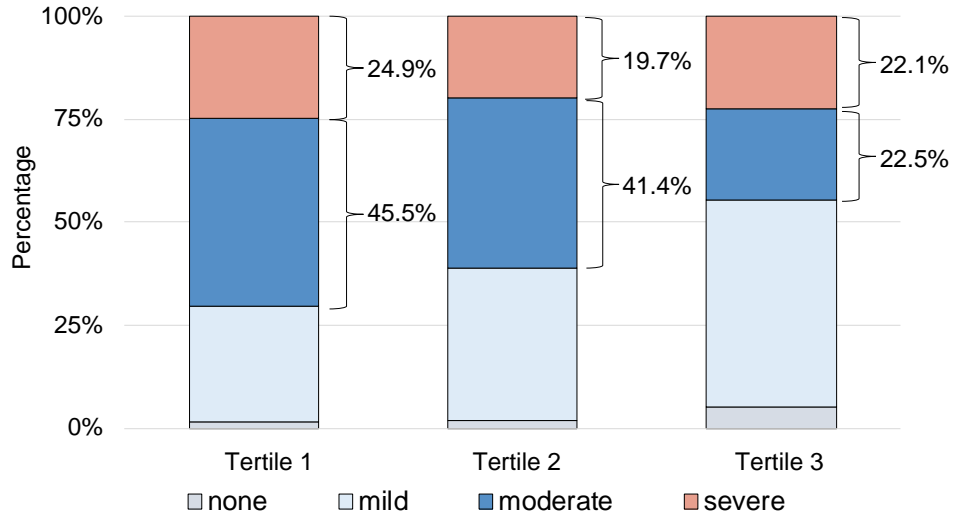

**Supplementary Figure 3. Severity of TR by TAPSE/PASP tertile.**

The severity of TR differed across the TAPSE/PASP tertiles ( $p < 0.001$ ). Patients with reduced TAPSE/PASP tended to have a more severe grade of TR.

PASP: pulmonary artery systolic pressure; TAPSE: tricuspid annular plane systolic excursion

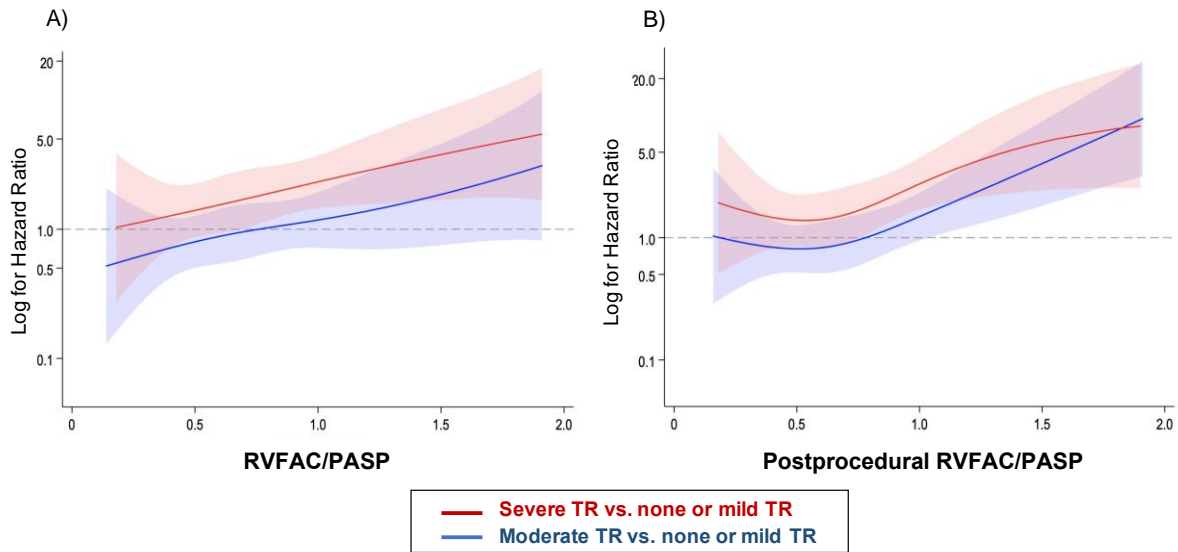

**Supplementary Figure 4. Fitting spline curve of the outcome correlation of TR according to RVFAC/PASP.**

Shown are the fitting spline curves showing the outcome correlation of TR across RVFAC/PASP using (A) parameters at baseline and (B) those after mitral valve treatment.

PASP: pulmonary artery systolic pressure; RVFAC: right ventricular fractional area change
